# Supplementary material for: Links between MIS 11 millennial to sub-millennial climate variability and long term trends as revealed by new high resolution EPICA Dome C deuterium data – A comparison with the Holocene
Source: Copernicus journal article supplement (doi:10.5194/cp-7-437-2011), 2011-04-29
Supplement: Supplementary file 1 [file Pol_EDC_MIS11_HighResol_Data.xls]

## Sheet: Feuil1
K. Pol, 01/03/2010.
EDC high resolution deuterium data for the MIS 11 period.
The measurements were conducted on 11 cm samples, coming from the fine cut of the EDC core. The accuracy is of 0.5‰ at 1σ
Column 1: Corresponding depth in the EDC core for each sample
Column 2: deuterium ratio (δD given in function of the V-SMOW standard)
Note : Missing values are replaced by "nan" annotations.
Depth (m)	Deut (per mil)
2694.45	-419.873
2694.56	-417.773
2694.67	-419.048
2694.78	-419.736
2694.89	-415.826
2695	-416.682
2695.11	-418.065
2695.22	-420.361
2695.33	-415.603
2695.44	-414.196
2695.55	-416.157
2695.66	-415.63
2695.77	-414.162
2695.88	-415.322
2695.99	-415.885
2696.1	-416.28
2696.21	-415.522
2696.32	-415.109
2696.43	-417.314
2696.54	-415.727
2696.65	-414.349
2696.76	-410.883
2696.87	-410.486
2696.98	-411.142
2697.09	-413.853
2697.2	-413.526
2697.31	-411.091
2697.42	-412.206
2697.53	-409.424
2697.64	-407.986
2697.75	-407.87
2697.86	-409.211
2697.97	-411.01
2698.08	-411.769
2698.19	-411.243
2698.3	-411.491
2698.41	-413.432
2698.52	-411.538
2698.63	-408.154
2698.74	-404.315
2698.85	-400.616
2698.96	nan
2699.07	-409.337
2699.18	-408.88
2699.29	-408.549
2699.4	-408.803
2699.51	-406.342
2699.62	-410.447
2699.73	-409.185
2699.84	-410.856
2699.95	-408.129
2700.06	-408.206
2700.17	-408.735
2700.28	-404.703
2700.39	-403.178
2700.5	-402.859
2700.61	-401.879
2700.72	-399.493
2700.83	-398.578
2700.94	-398.361
2701.05	-401.662
2701.16	-402.479
2701.27	-400.997
2701.38	-400.863
2701.49	-404.281
2701.6	-402.645
2701.71	-402.292
2701.82	-403.567
2701.93	-404.25
2702.04	-405.566
2702.15	-404.89
2702.26	-401.603
2702.37	-399.581
2702.48	-401.63
2702.59	-403.831
2702.7	-404.169
2702.81	-405.639
2702.92	-402.09
2703.03	-400.973
2703.14	-402.869
2703.25	-401.209
2703.36	-404.395
2703.47	-404.973
2703.58	-403.616
2703.69	-398.742
2703.8	-397.167
2703.91	-399.643
2704.02	-401.097
2704.13	-401.49
2704.24	-397.979
2704.35	nan
2704.46	-396.967
2704.57	-394.104
2704.68	-397.347
2704.79	-399.419
2704.9	-397.537
2705.01	-396.897
2705.12	-399.568
2705.23	-398.355
2705.34	-399.378
2705.45	-399.255
2705.56	-397.78
2705.67	-395.696
2705.78	-397.011
2705.89	-399.295
2706	-399.503
2706.11	-400.079
2706.22	-399.797
2706.33	-399.079
2706.44	-394.84
2706.55	-392.038
2706.66	-393.975
2706.77	-394.269
2706.88	-393.091
2706.99	-395.117
2707.1	-396.323
2707.21	-395.955
2707.32	-395.22
2707.43	-396.945
2707.54	-398.222
2707.65	-395.657
2707.76	-394.775
2707.87	-396.743
2707.98	-399.048
2708.09	-399.542
2708.2	-401.465
2708.31	-401.837
2708.42	-401.212
2708.53	-398.987
2708.64	-399.387
2708.75	-399.399
2708.86	-401.556
2708.97	-400.139
2709.08	-398.216
2709.19	-398.028
2709.3	-396.286
2709.41	-394.064
2709.52	-392.438
2709.63	-396.163
2709.74	-395.544
2709.85	-393.9
2709.96	-396.621
2710.07	-395.932
2710.18	-396.442
2710.29	-396.925
2710.4	-395.293
2710.51	-396.575
2710.62	-396.626
2710.73	-394.398
2710.84	-394.033
2710.95	-397.744
2711.06	-400.621
2711.17	-399.672
2711.28	-398.675
2711.39	-397.24
2711.5	-395.04
2711.61	-395.466
2711.72	-396.077
2711.83	-395.619
2711.94	-396.205
2712.05	-396.69
2712.16	-396.113
2712.27	-396.769
2712.38	-396.014
2712.49	-394.972
2712.6	-395.585
2712.71	-397.795
2712.82	-395.231
2712.93	-389.394
2713.04	-389.377
2713.15	-392.549
2713.26	-393.663
2713.37	-392.457
2713.48	-393.959
2713.59	-394.988
2713.7	-391.457
2713.81	-389.591
2713.92	-390.682
2714.03	-394.652
2714.14	-391.273
2714.25	-388.26
2714.36	-390.164
2714.47	-388.622
2714.58	-389.826
2714.69	-389.059
2714.8	-388.549
2714.91	-390.102
2715.02	-391.738
2715.13	-394.27
2715.24	-393.492
2715.35	-394.299
2715.46	-395.314
2715.57	-393.243
2715.68	-392.366
2715.79	-392.238
2715.9	-391.681
2716.01	-394.172
2716.12	-394.28
2716.23	-393.371
2716.34	-392.245
2716.45	-389.347
2716.56	-385.608
2716.67	-385.633
2716.78	-390.45
2716.89	-391.419
2717	-389.431
2717.11	-386.439
2717.22	-389.283
2717.33	-391.119
2717.44	-389.557
2717.55	-388.486
2717.66	-389.494
2717.77	-387.581
2717.88	-387.041
2717.99	-387.068
2718.1	-387.616
2718.21	-389.478
2718.32	-391.815
2718.43	-389.607
2718.54	-390.33
2718.65	-392.875
2718.76	-391.763
2718.87	-388.132
2718.98	-388.55
2719.09	-389.793
2719.2	-388.452
2719.31	-386.78
2719.42	-384.945
2719.53	-385.65
2719.64	-388.015
2719.75	-389.061
2719.86	-386.499
2719.97	-386.644
2720.08	-390.657
2720.19	-392.719
2720.3	-389.79
2720.41	-387.217
2720.52	-387.912
2720.63	-388.511
2720.74	-388.086
2720.85	-385.997
2720.96	-384.968
2721.07	-385.2
2721.18	-387.97
2721.29	-389.03
2721.4	-387.497
2721.51	-384.425
2721.62	-384.517
2721.73	-382.936
2721.84	-384.701
2721.95	-383.541
2722.06	-382.74
2722.17	-382.215
2722.28	-385.23
2722.39	-383.421
2722.5	-385.693
2722.61	-384.931
2722.72	-383.779
2722.83	-384.715
2722.94	-386.742
2723.05	-384.095
2723.16	-381.855
2723.27	-383.744
2723.38	-387.221
2723.49	-386.675
2723.6	-385.9
2723.71	-385.789
2723.82	-384.481
2723.93	-387.549
2724.04	-389.246
2724.15	-388.185
2724.26	-385.771
2724.37	-385.527
2724.48	-386.098
2724.59	-385.505
2724.7	-386.409
2724.81	-386.083
2724.92	-385.328
2725.03	-385.854
2725.14	-387.081
2725.25	-387.474
2725.36	-388.637
2725.47	-388.053
2725.58	-389.045
2725.69	-388.751
2725.8	-390.383
2725.91	-387.839
2726.02	-384.293
2726.13	-378.602
2726.24	-381.715
2726.35	-384.626
2726.46	-386.96
2726.57	-383.778
2726.68	-381.894
2726.79	-382.05
2726.9	-384.312
2727.01	-385.101
2727.12	-385.515
2727.23	-385.034
2727.34	-386.731
2727.45	-386.491
2727.56	-388.334
2727.67	-385.842
2727.78	-383.148
2727.89	-381.817
2728	-381.494
2728.11	-381.438
2728.22	-385.964
2728.33	-386.506
2728.44	-387.465
2728.55	-387.478
2728.66	-384.795
2728.77	-388.718
2728.88	-392.333
2728.99	-391.635
2729.1	-389.474
2729.21	-387.672
2729.32	-383.099
2729.43	-379.715
2729.54	-379.626
2729.65	-380.309
2729.76	-380.939
2729.87	-380.701
2729.98	-383.115
2730.09	-383.922
2730.2	-383.664
2730.31	-382.132
2730.42	-380.705
2730.53	-383.34
2730.64	-384.207
2730.75	-381.737
2730.86	-380.321
2730.97	-379.706
2731.08	-384.45
2731.19	-385.666
2731.3	-385.244
2731.41	-386.726
2731.52	-385.218
2731.63	-382.6
2731.74	-384.481
2731.85	-386.475
2731.96	-386.55
2732.07	-386.56
2732.18	-386.88
2732.29	-385.232
2732.4	-382.916
2732.51	-382.185
2732.62	-381.172
2732.73	-380.645
2732.84	-383.7
2732.95	-387.616
2733.06	-387.362
2733.17	-385.444
2733.28	-384.83
2733.39	-383.303
2733.5	-380.9
2733.61	-382.324
2733.72	-382.545
2733.83	-382.311
2733.94	-382.53
2734.05	-380.538
2734.16	-381.169
2734.27	-380.304
2734.38	-380.81
2734.49	-382.923
2734.6	-385.503
2734.71	-385.693
2734.82	-384.565
2734.93	-382.86
2735.04	-385.01
2735.15	-384.196
2735.26	-380.93
2735.37	-379.289
2735.48	-377.111
2735.59	-380.034
2735.7	-385.138
2735.81	-386.52
2735.92	-385.584
2736.03	-385.419
2736.14	-385.52
2736.25	-385.031
2736.36	-384.764
2736.47	-383.263
2736.58	-384.331
2736.69	-383.607
2736.8	-381.934
2736.91	-382.881
2737.02	-381.477
2737.13	-381.532
2737.24	-382.598
2737.35	-381.539
2737.46	-385.178
2737.57	-387.827
2737.68	-384.892
2737.79	-382.092
2737.9	-383.987
2738.01	-388.508
2738.12	-388.872
2738.23	-384.416
2738.34	-383.991
2738.45	-385.395
2738.56	-387.624
2738.67	-386.805
2738.78	-385.987
2738.89	-386.66
2739	-384.876
2739.11	-385.726
2739.22	-386.605
2739.33	-387.597
2739.44	-387.329
2739.55	-383.644
2739.66	-383.703
2739.77	-385.793
2739.88	-385.846
2739.99	-384.084
2740.1	-382.911
2740.21	-382.474
2740.32	-381.756
2740.43	-383.538
2740.54	-386.199
2740.65	-387.437
2740.76	-386.851
2740.87	-385.895
2740.98	-387.762
2741.09	-387.32
2741.2	-383.041
2741.31	-383.334
2741.42	-384.882
2741.53	-382.697
2741.64	-382.321
2741.75	-384.144
2741.86	-385.728
2741.97	-384.75
2742.08	-384.365
2742.19	-385.153
2742.3	-388.173
2742.41	-387.899
2742.52	-385.85
2742.63	-384.639
2742.74	-386.895
2742.85	-387.039
2742.96	-385.334
2743.07	-388.93
2743.18	-389.784
2743.29	-386.444
2743.4	-385.855
2743.51	-389.487
2743.62	-387.447
2743.73	-385.976
2743.84	-386.179
2743.95	-385.55
2744.06	-385.165
2744.17	-384.708
2744.28	-386.677
2744.39	-389.126
2744.5	-387.786
2744.61	-387.629
2744.72	-387.374
2744.83	-386.067
2744.94	-387.706
2745.05	-386.299
2745.16	-385.703
2745.27	-385.16
2745.38	-386.197
2745.49	-386.114
2745.6	-384.959
2745.71	-389.621
2745.82	-392.271
2745.93	-389.371
2746.04	-386.759
2746.15	-385.639
2746.26	-388.061
2746.37	-389.77
2746.48	-391.272
2746.59	-389.33
2746.7	-387.167
2746.81	-387.108
2746.92	-387.576
2747.03	-386.084
2747.14	-386.286
2747.25	-388.718
2747.36	-389.177
2747.47	-391.154
2747.58	-392.347
2747.69	-388.887
2747.8	-389.425
2747.91	-395.282
2748.02	-396.071
2748.13	-392.27
2748.24	-391.388
2748.35	-394.803
2748.46	-395.138
2748.57	-394.725
2748.68	-392.953
2748.79	-393.146
2748.9	-393.542
2749.01	-394.933
2749.12	-394.375
2749.23	-392.485
2749.34	-392.192
2749.45	-391.356
2749.56	-392.069
2749.67	-393.736
2749.78	-395.164
2749.89	-393.453
2750	-393.91
2750.11	-395.889
2750.22	-397.223
2750.33	-397.106
2750.44	-393.398
2750.55	-392.073
2750.66	-392.404
2750.77	-393.141
2750.88	-392.8
2750.99	-391.247
2751.1	-392.011
2751.21	-395.223
2751.32	-393.774
2751.43	-393.329
2751.54	-393.416
2751.65	-392.805
2751.76	-393.434
2751.87	-394.164
2751.98	-394.002
2752.09	-395.844
2752.2	-395.772
2752.31	-391.491
2752.42	-389.94
2752.53	-392.767
2752.64	-392.809
2752.75	-390.979
2752.86	-391.942
2752.97	-393.511
2753.08	-393.081
2753.19	-397.028
2753.3	-398.279
2753.41	-397.513
2753.52	-394.446
2753.63	-393.169
2753.74	-393.646
2753.85	-396.641
2753.96	-395.204
2754.07	-393.072
2754.18	-391.68
2754.29	-391.445
2754.4	-392.23
2754.51	-394.719
2754.62	-393.612
2754.73	-392.967
2754.84	-391.916
2754.95	-393.405
2755.06	-395.784
2755.17	-394.893
2755.28	-392.931
2755.39	-395.268
2755.5	-396.176
2755.61	-395.803
2755.72	-394.691
2755.83	-395.688
2755.94	-396.109
2756.05	-392.22
2756.16	-391.668
2756.27	-393.065
2756.38	-392.146
2756.49	-390.061
2756.6	-391.144
2756.71	-394.591
2756.82	-395.495
2756.93	-394.692
2757.04	-394.572
2757.15	-392.977
2757.26	-396.566
2757.37	-395.773
2757.48	-391.993
2757.59	-395.026
2757.7	-395.459
2757.81	-393.29
2757.92	-393.32
2758.03	-394.22
2758.14	-394.681
2758.25	-393.604
2758.36	-393.626
2758.47	-393.427
2758.58	-389.475
2758.69	-391.392
2758.8	-394.983
2758.91	-394.982
2759.02	-393.745
2759.13	-391.631
2759.24	-391.128
2759.35	-394.763
2759.46	-395.613
2759.57	-391.866
2759.68	-390.436
2759.79	-390.376
2759.9	-389.514
2760.01	-390.412
2760.12	-390.884
2760.23	-388.465
2760.34	-390.075
2760.45	-394.071
2760.56	-392.769
2760.67	-391.895
2760.78	-394.916
2760.89	-394.284
2761	-394.223
2761.11	-393.885
2761.22	-395.188
2761.33	-394.163
2761.44	-390.299
2761.55	-391.325
2761.66	-393.273
2761.77	-393.168
2761.88	-392.732
2761.99	-394.271
2762.1	-394.087
2762.21	-391.894
2762.32	-391.926
2762.43	-395.229
2762.54	-397.4
2762.65	-395.802
2762.76	-394.245
2762.87	-393.185
2762.98	-394.595
2763.09	-394.646
2763.2	-392.507
2763.31	-395.036
2763.42	-398.772
2763.53	-399.552
2763.64	-398.903
2763.75	-399.274
2763.86	-397.719
2763.97	-394.698
2764.08	-394.541
2764.19	-396.177
2764.3	-393.811
2764.41	-393.026
2764.52	-393.699
2764.63	-394.642
2764.74	-398.677
2764.85	-396.979
2764.96	-395.353
2765.07	-394.677
2765.18	-394.78
2765.29	-394.737
2765.4	-394.038
2765.51	-395.908
2765.62	-396.492
2765.73	-395.94
2765.84	-399.284
2765.95	-398.209
2766.06	-397.451
2766.17	-398.268
2766.28	-396.021
2766.39	-394.891
2766.5	-394.609
2766.61	-396.665
2766.72	-398.858
2766.83	-397.297
2766.94	-396.969
2767.05	-395.746
2767.16	-396.49
2767.27	-396.555
2767.38	-396.979
2767.49	-396.758
2767.6	-394.902
2767.71	-395.657
2767.82	-396.761
2767.93	-400.078
2768.04	-397.513
2768.15	-394.341
2768.26	-394.206
2768.37	-398.064
2768.48	-400.334
2768.59	-402.71
2768.7	-402.485
2768.81	-402.823
2768.92	-400.803
2769.03	-402.633
2769.14	-403.311
2769.25	-400.652
2769.36	-401.707
2769.47	-400.385
2769.58	-402.933
2769.69	-405.788
2769.8	-403.811
2769.91	-402.072
2770.02	-402.574
2770.13	-402.667
2770.24	-400.546
2770.35	-401.768
2770.46	-402.442
2770.57	-406.367
2770.68	-403.798
2770.79	-401.34
2770.9	nan
2771.01	-401.476
2771.12	-403.601
2771.23	-403.998
2771.34	-403.235
2771.45	-399.489
2771.56	-402.733
2771.67	-399.09
2771.78	-396.965
2771.89	-400.775
2772	-405.63
2772.11	-404.806
2772.22	-400.319
2772.33	-400.784
2772.44	-405.126
2772.55	-408.7
2772.66	-408.501
2772.77	-407.796
2772.88	-404.674
2772.99	-403.207
2773.1	-401.31
2773.21	-400.36
2773.32	-402.821
2773.43	-404.729
2773.54	-404.16
2773.65	-404.522
2773.76	-405.773
2773.87	-404.91
2773.98	-403.746
2774.09	-400.878
2774.2	-399.668
2774.31	-399.841
2774.42	-399.635
2774.53	-397.27
2774.64	-394.173
2774.75	-394.828
2774.86	-392.348
2774.97	-392.83
2775.08	-392.061
2775.19	-390.244
2775.3	-388.882
2775.41	-389.648
2775.52	-389.937
2775.63	-392.87
2775.74	-392.65
2775.85	-391.119
2775.96	-392.72
2776.07	-392.519
2776.18	-392.036
2776.29	-391.85
2776.4	-391.978
2776.51	-394.612
2776.62	-398.569
2776.73	-395.107
2776.84	-396.48
2776.95	-399.93
2777.06	-402.39
2777.17	-400.775
2777.28	-399.754
2777.39	-403.042
2777.5	-403.427
2777.61	-403.124
2777.72	-400.278
2777.83	-397.707
2777.94	-401.771
2778.05	-399.963
2778.16	-401.779
2778.27	-401.269
2778.38	-402.752
2778.49	-404.064
2778.6	-404.43
2778.71	-404.721
2778.82	-406.552
2778.93	-406.047
2779.04	-405.589
